# Supplementary material for: Synthesis and characterization of an oligomeric conjugated metal-containing poly(p-phenylenevinylene) analogue
Source: Royal Society of Chemistry journal article supplement (doi:10.1039/c0dt00121j), 2010-01-01
Supplement: c0dt00121j.pdf [file c0dt00121j.pdf]

## Synthesis and Characterization of a Oligomeric Conjugated Metal-Containing Poly(*p*-phenylenevinylene) Analogue

*Jian Jiang, Alfred C. W. Leung, and Mark J. MacLachlan\**

Department of Chemistry, University of British Columbia, 2036 Main Mall,  
Vancouver, BC V6T 1Z1 CANADA.

mmaclach@chem.ubc.ca

### Table of Contents

|            |                                                     |    |
|------------|-----------------------------------------------------|----|
| Figure S1  | <sup>1</sup> H NMR spectrum of <b>6</b>             | S3 |
| Figure S2  | <sup>13</sup> C NMR spectrum of <b>6</b>            | S3 |
| Figure S3  | EI-MS spectrum of <b>6</b>                          | S4 |
| Figure S4  | <sup>1</sup> H NMR spectrum of <b>2</b>             | S4 |
| Figure S5  | <sup>13</sup> C NMR spectrum of <b>2</b>            | S5 |
| Figure S6  | MALDI-TOF Mass spectrum of <b>2</b>                 | S5 |
| Figure S7  | GPC spectrum of <b>8</b>                            | S6 |
| Figure S8  | Partial of <sup>1</sup> H NMR spectrum of <b>8</b>  | S6 |
| Figure S9  | TGA of polymer <b>8</b>                             | S7 |
| Figure S10 | IR spectra of polymer <b>8</b> and monomer <b>2</b> | S7 |
| Figure S11 | <sup>1</sup> H NMR spectrum of <b>9</b>             | S8 |
| Figure S12 | <sup>13</sup> C NMR spectrum of <b>9</b>            | S8 |

|            |                                           |     |
|------------|-------------------------------------------|-----|
| Figure S13 | ESI-MS spectrum of <b>9</b>               | S9  |
| Figure S14 | <sup>31</sup> P NMR spectrum of <b>9</b>  | S9  |
| Figure S15 | <sup>1</sup> H NMR spectrum of <b>10</b>  | S10 |
| Figure S16 | <sup>13</sup> C NMR spectrum of <b>10</b> | S10 |
| Figure S17 | ESI-MS spectrum of <b>10</b>              | S11 |

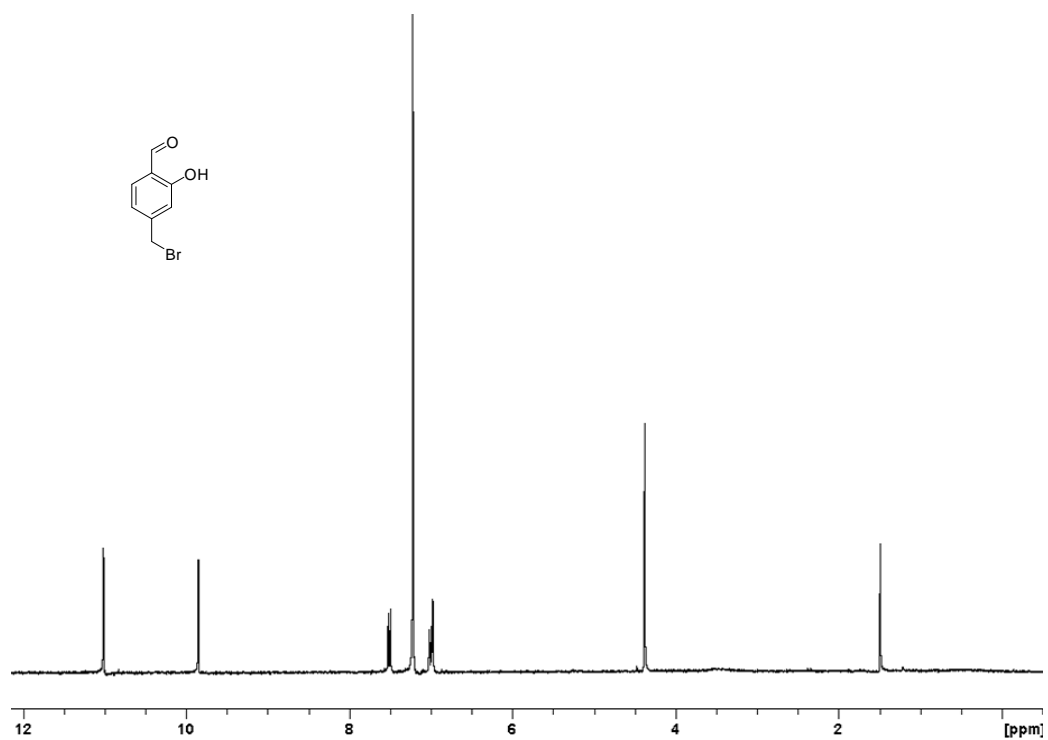

**Figure S1.** <sup>1</sup>H NMR spectrum of **6** (300 MHz, CDCl<sub>3</sub>, 298 K).

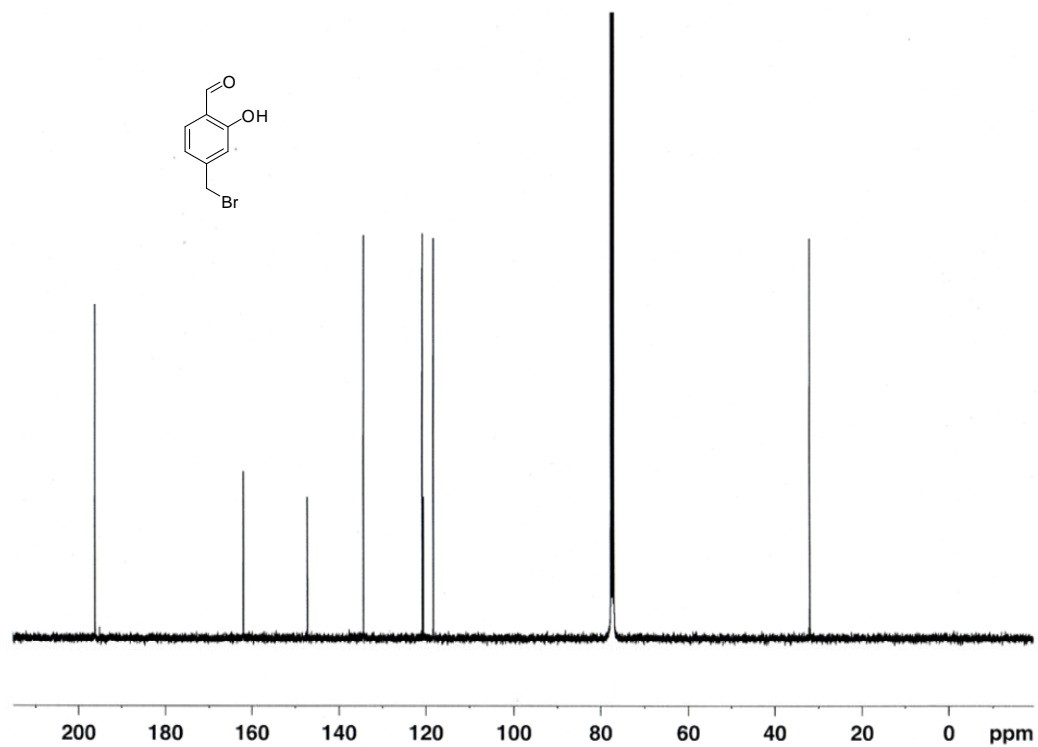

**Figure S2.** <sup>13</sup>C NMR spectrum of **6** (100.6 MHz, CDCl<sub>3</sub>, 298 K).

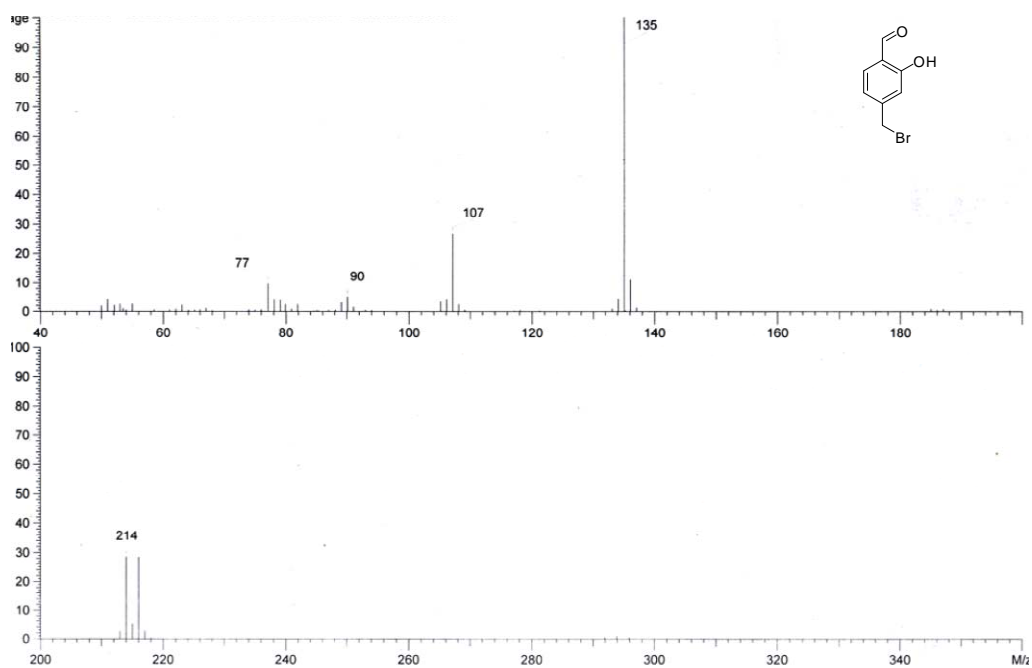

**Figure S3.** EI-MS spectrum of **6**

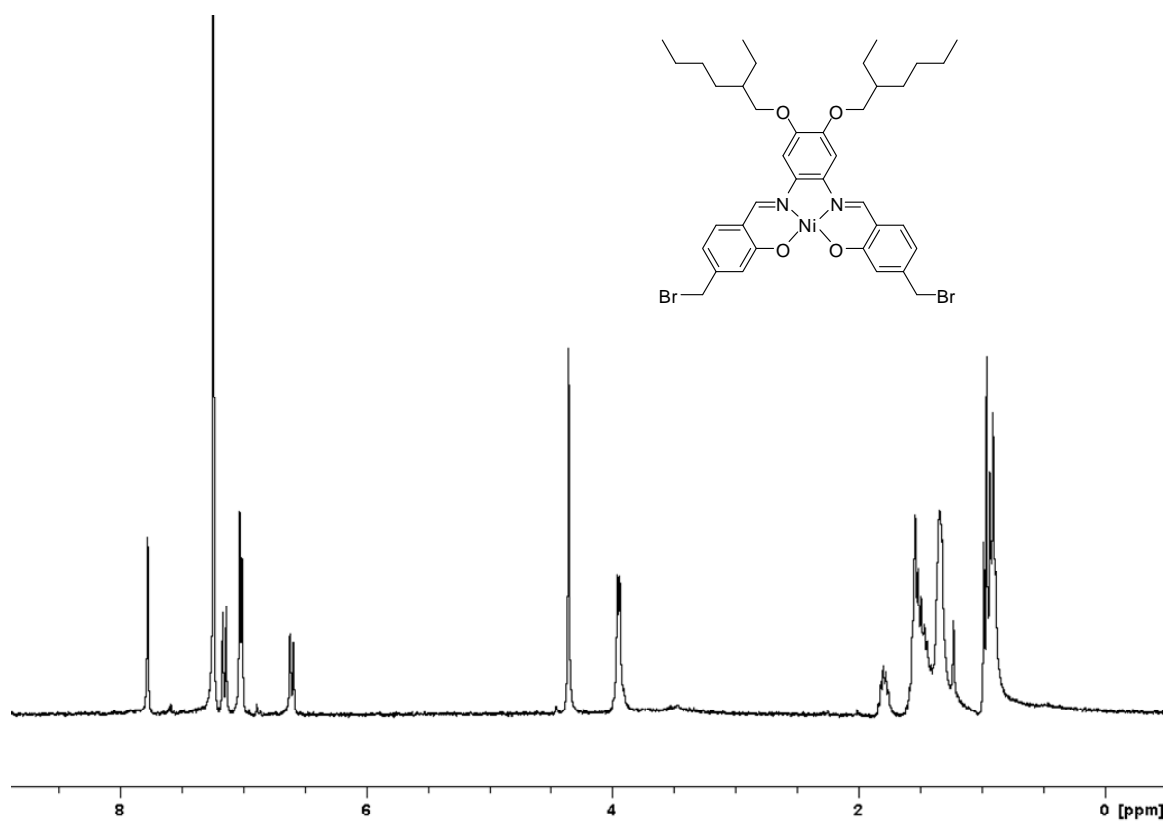

**Figure S4.** <sup>1</sup>H NMR spectrum of **2** (300 MHz, CDCl<sub>3</sub> (with trace of THF), 298 K)

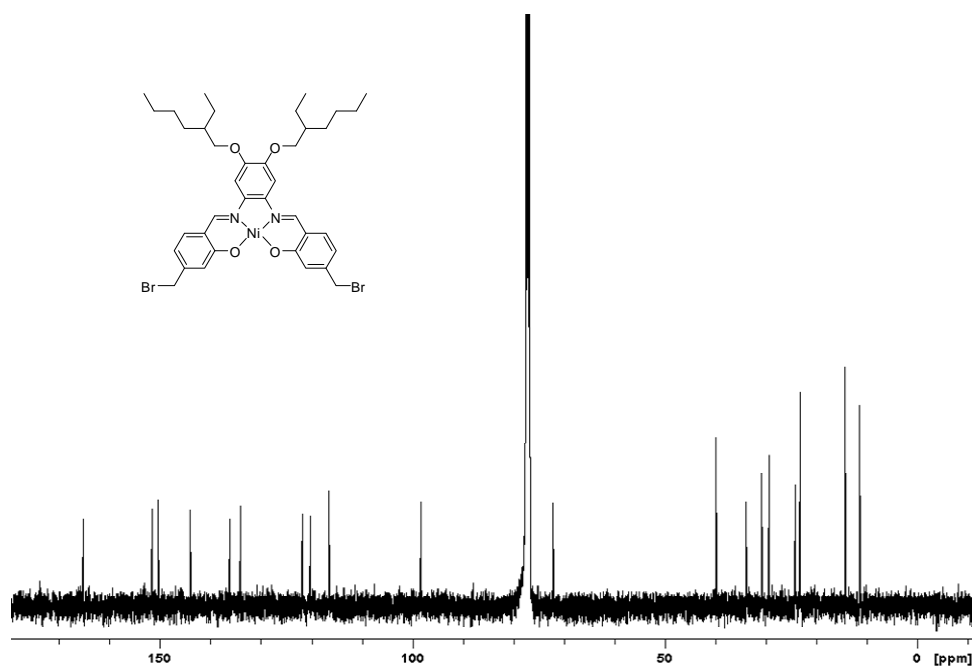

**Figure S5.**  $^{13}\text{C}$  NMR spectrum of **2** (100.6 MHz,  $\text{CDCl}_3$ , 298 K).

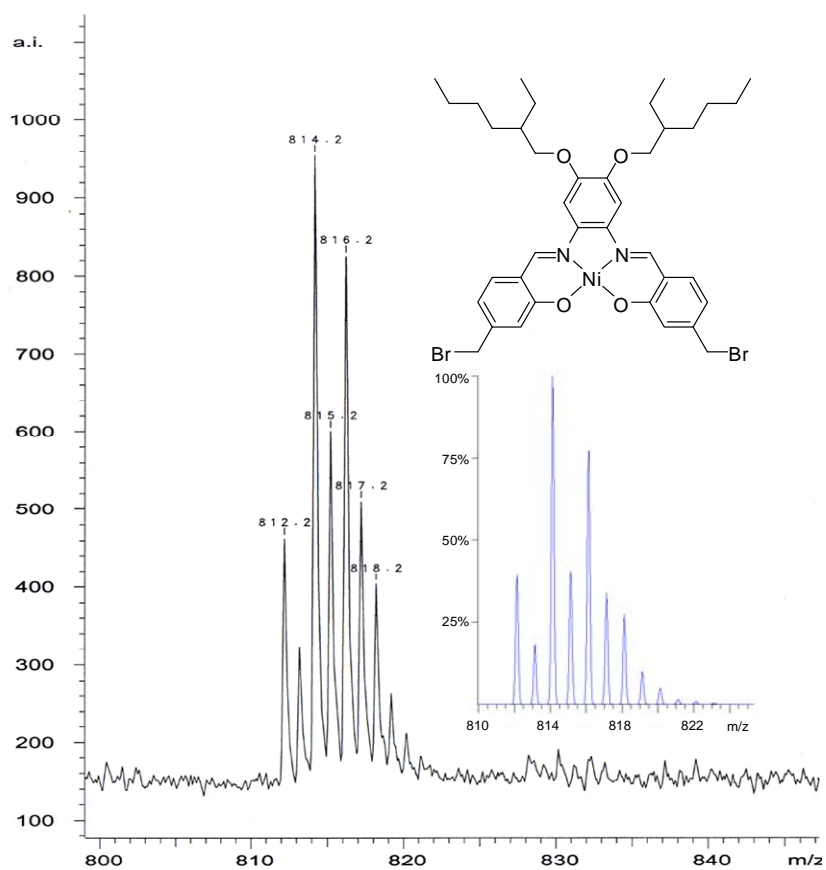

**Figure S6.** MALDI-TOF mass spectrum of **2**. Inset: Simulated isotope distribution for  $[2]^+$

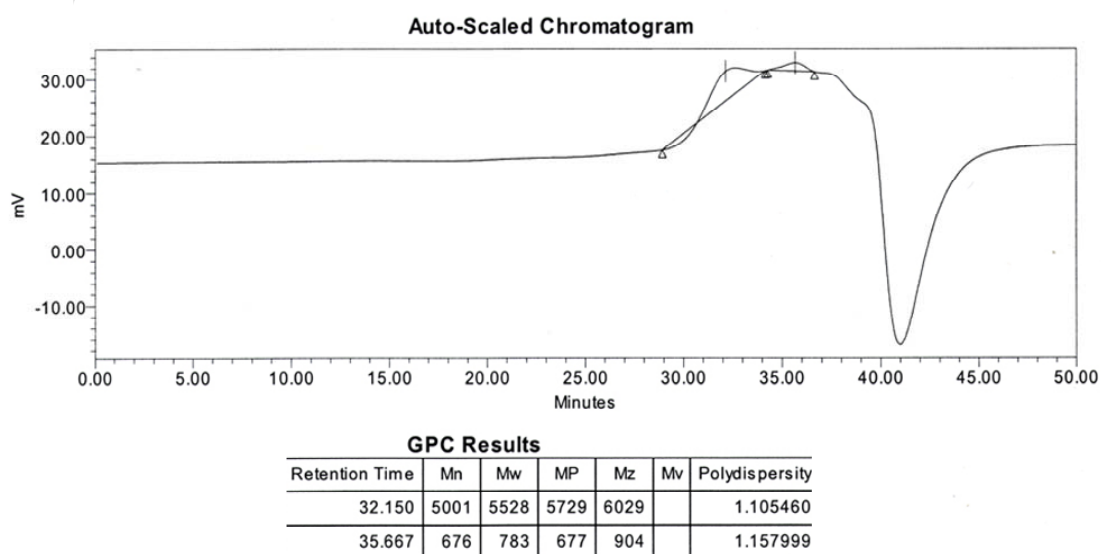

**Figure S7.** GPC of polymer **8**

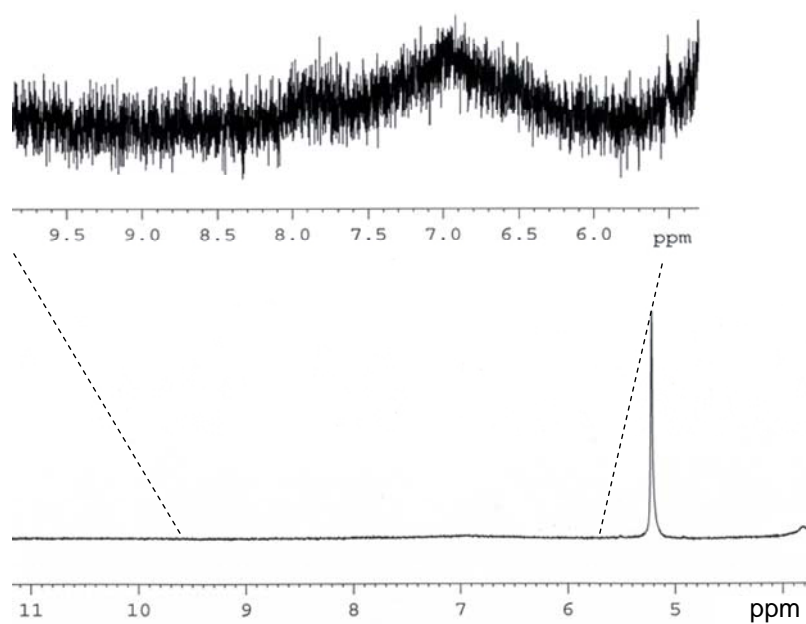

**Figure S8.** Partial of  $^1\text{H}$  NMR spectrum of **8** (400 MHz,  $\text{CD}_2\text{Cl}_2$  (with a trace of  $\text{THF-}d_8$ ), 298K).

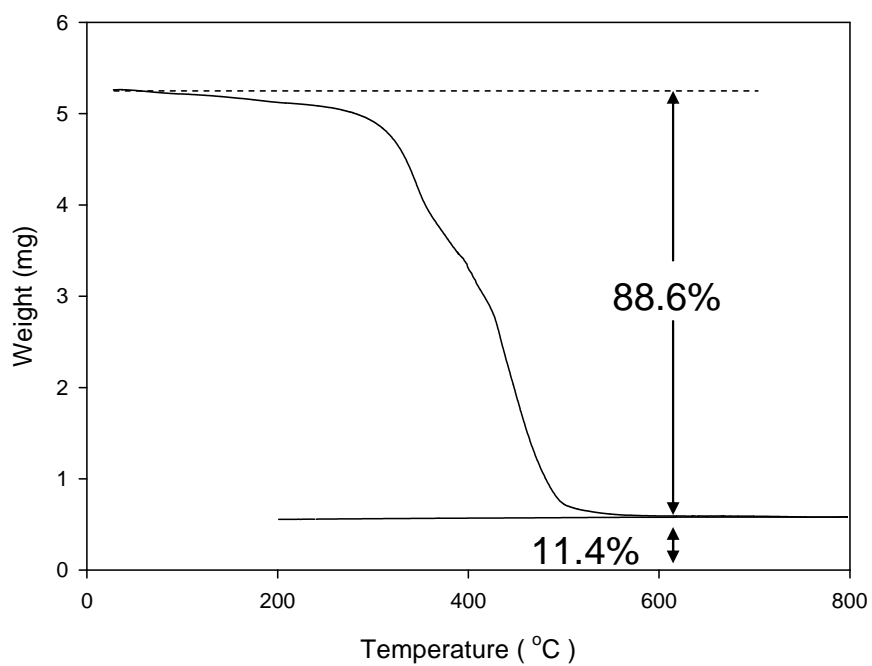

**Figure S9.** TGA of polymer **8**

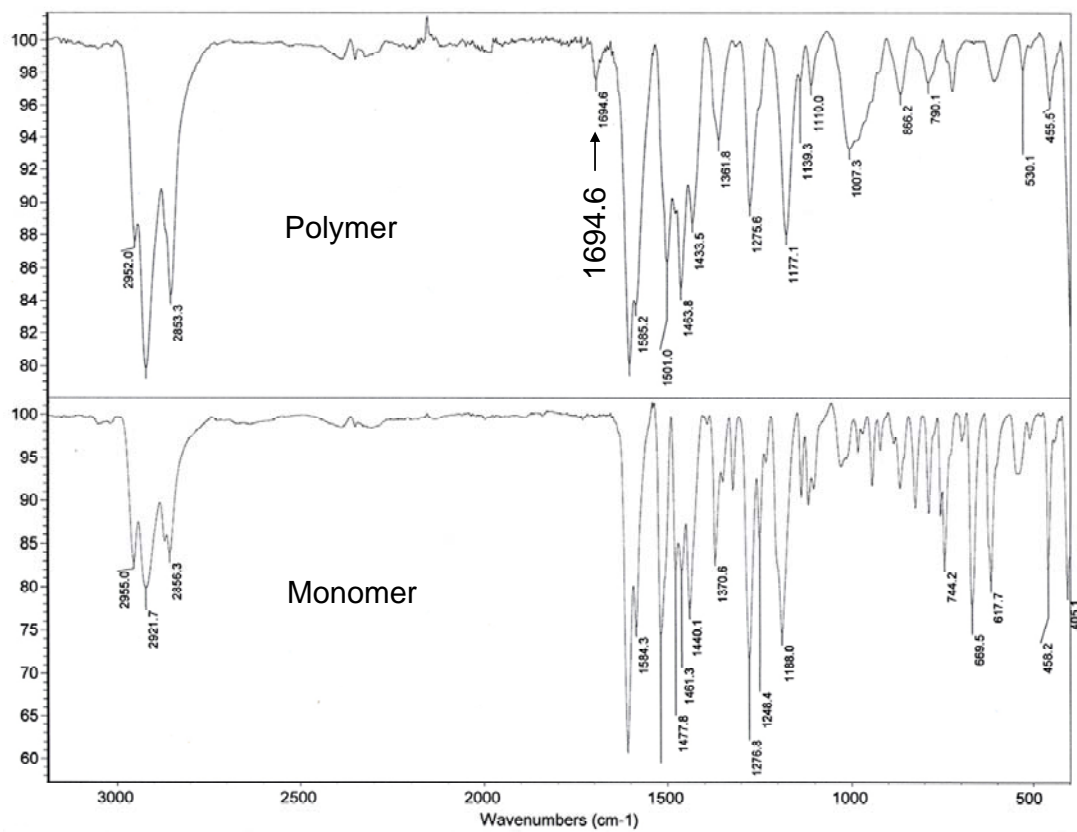

**Figure S10.** IR spectra of polymer **8** and monomer **2**

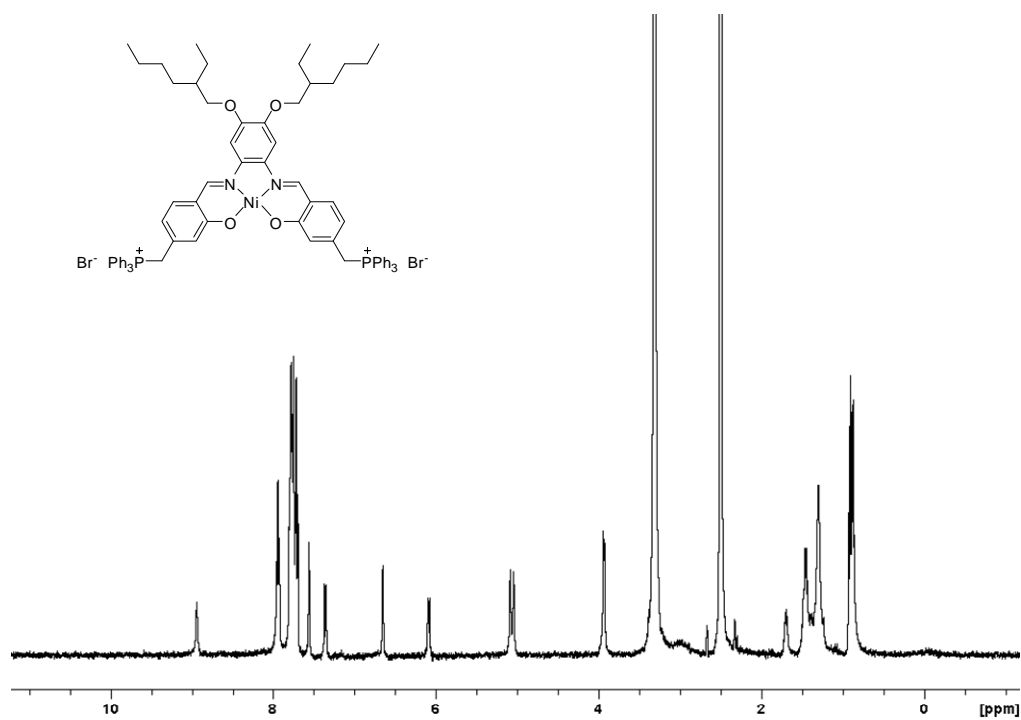

**Figure 11.** <sup>1</sup>H NMR spectrum of **9** (400 MHz, DMSO-*d*<sub>6</sub>, 298 K).

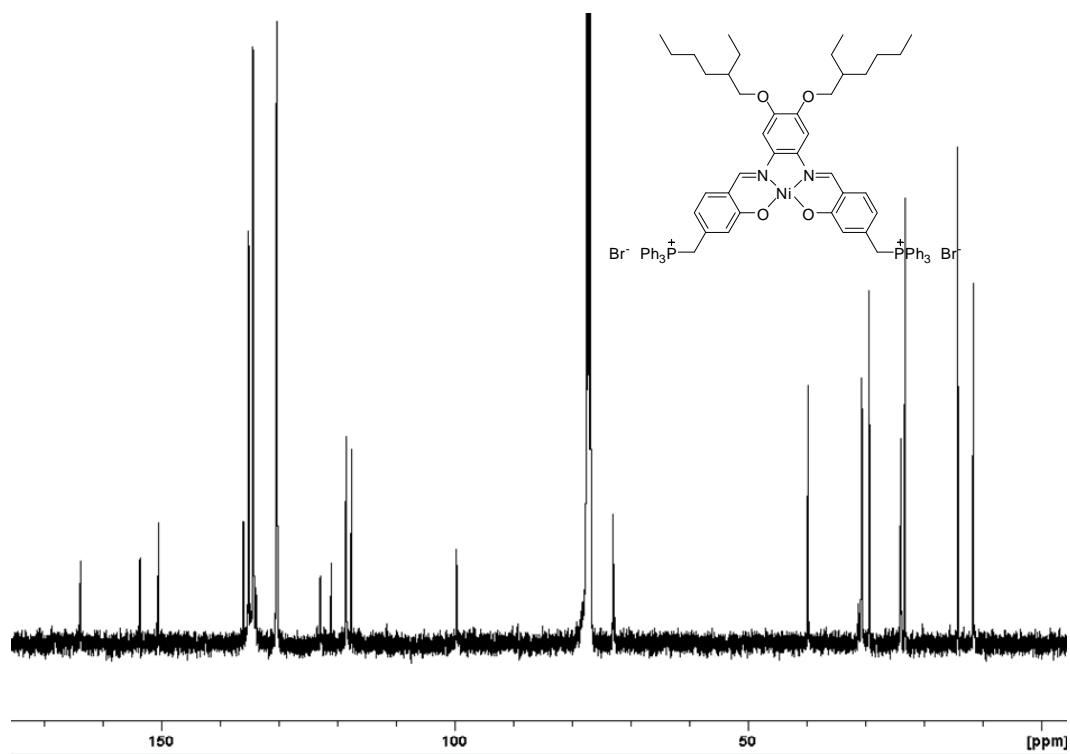

**Figure S12.** <sup>13</sup>C NMR spectrum of **9** (100.6 MHz, CDCl<sub>3</sub>, 298 K).



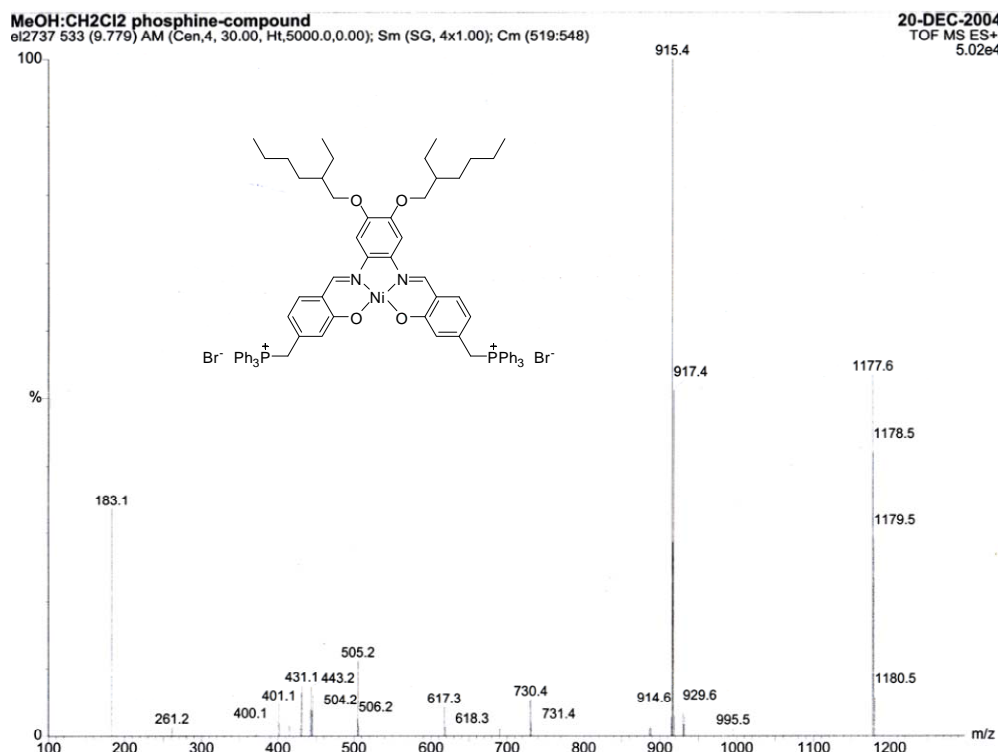

Figure S13. ESI-MS of 9.

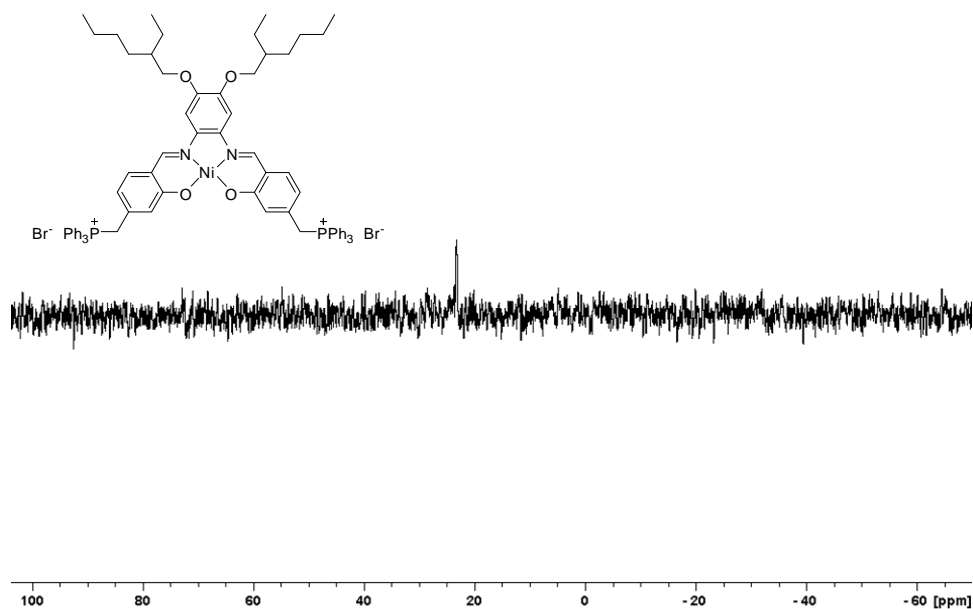

Figure S14. <sup>31</sup>P NMR spectrum of 9 (121.4 MHz, DMSO-*d*<sub>6</sub>, 298 K, 8% H<sub>3</sub>PO<sub>4</sub> aqueous solution as external reference).

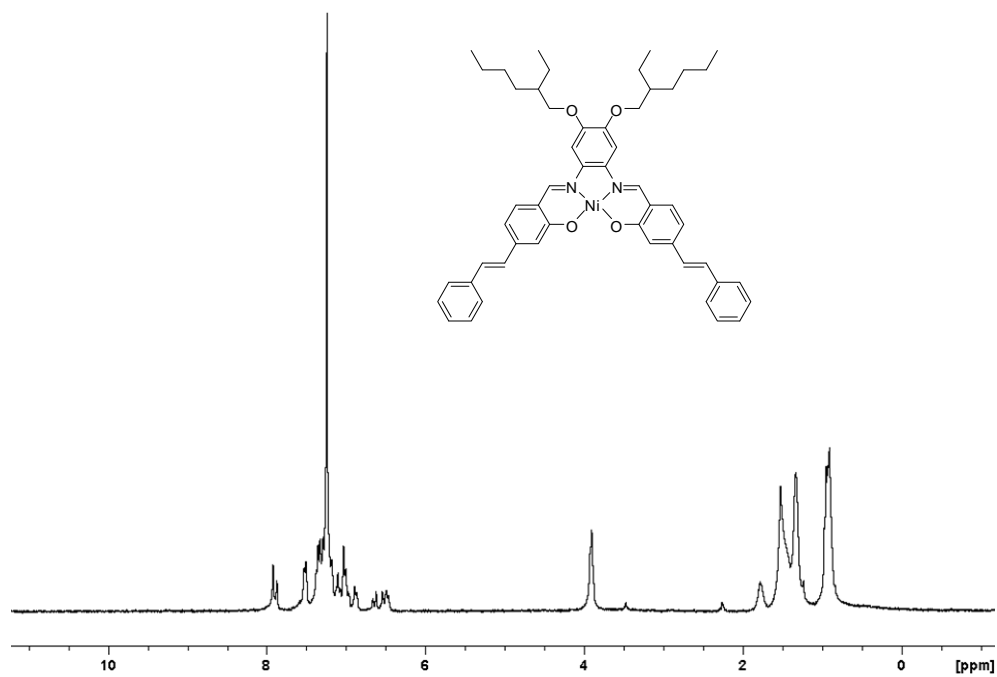

**Figure S15.** <sup>1</sup>H NMR spectrum of **10** (400 MHz, CDCl<sub>3</sub>, 298 K).

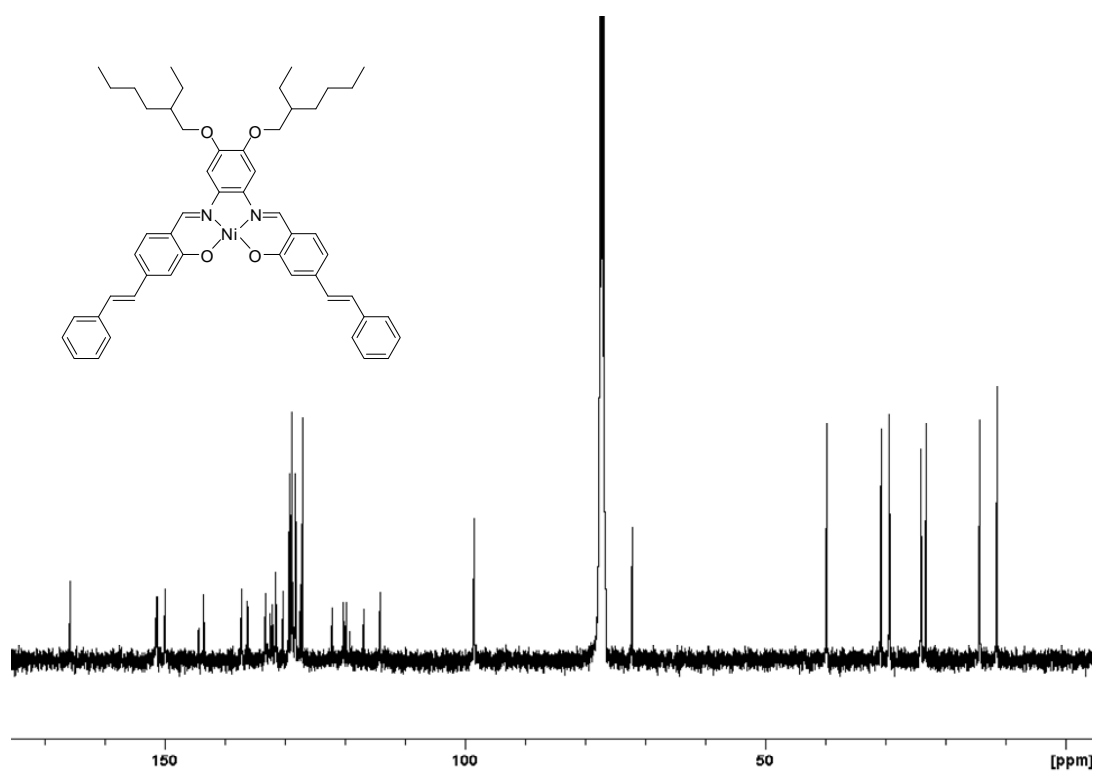

**Figure S16.** <sup>13</sup>C NMR spectrum of **10** (100.6 MHz, DMSO-*d*<sub>6</sub>, 298 K).

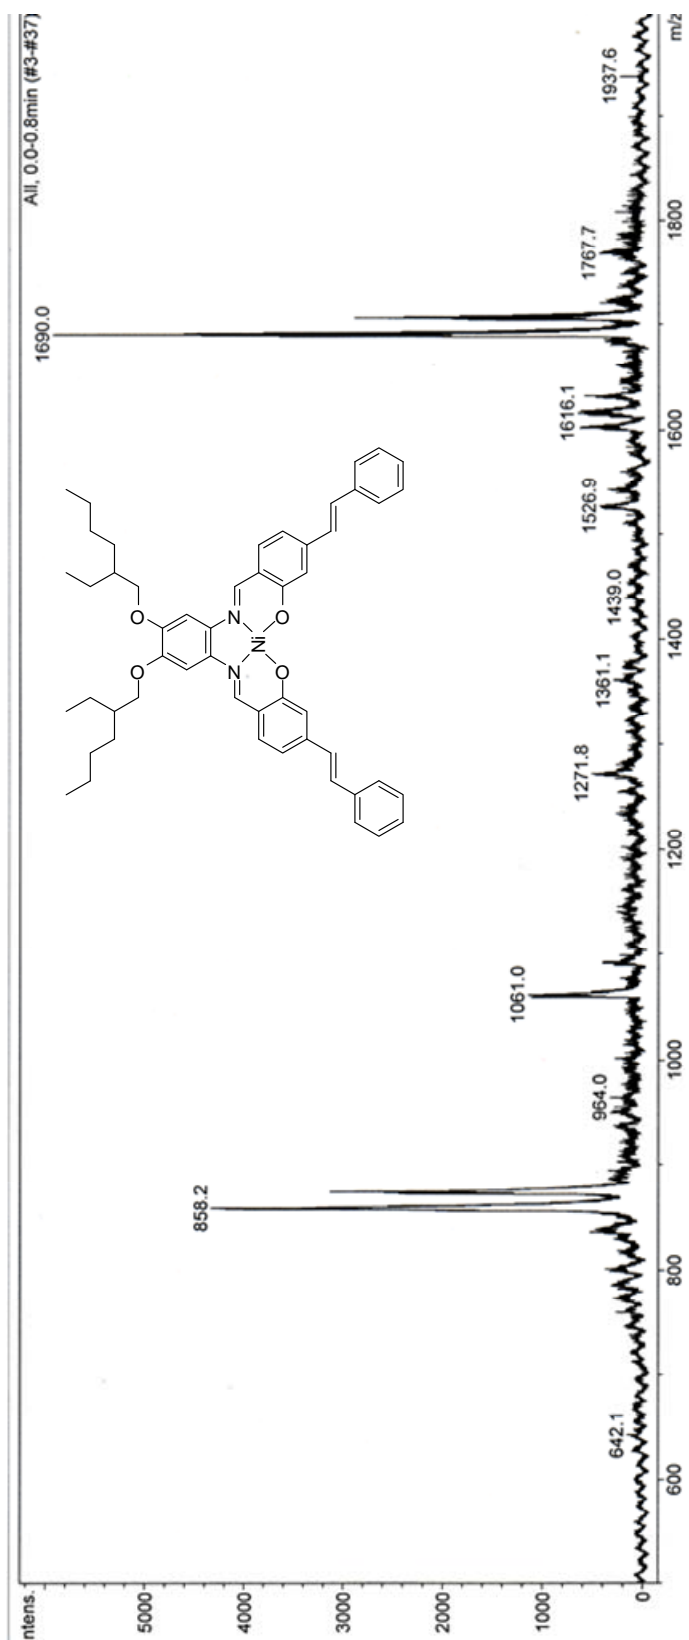

**Figure S17.** ESI-MS spectrum of **10**.
